1 **Title: Structural snapshots of V/A-ATPase reveal a new paradigm for**  
2 **rotary catalysis.**

3

4 **Authors:** J. Kishikawa<sup>1,2</sup>†, A. Nakanishi<sup>1,3</sup>†, A. Nakano<sup>1</sup>†, S. Saeki<sup>1</sup>, A. Furuta<sup>1</sup>, T. Kato<sup>2</sup>,  
5 K. Mistuoka<sup>3</sup>, and K. Yokoyama<sup>1\*</sup>.

6 **Affiliations:** <sup>1</sup>Department of Molecular Biosciences, Kyoto Sangyo University, Kamigamo-  
7 Motoyama, Kita-ku, Kyoto 603-8555, Japan;

8 <sup>2</sup>Institute for Protein Research, Osaka University, 3-2 Yamadaoka, Suita, Osaka 565-0871  
9 Japan;

10 <sup>3</sup>Research Center for Ultra-High Voltage Electron Microscopy, Osaka University, 7-1,  
11 Mihogaoka, Ibaraki, Osaka, 567-0047 Japan.

12

13 †J.K, A. Nakanishi., and A. Nakano contributed equally to this work

14 \*Corresponding author. Email: yokoken@cc.kyoto-su.ac.jp

15

## 1 **Abstract**

2 V/A-ATPase is a motor protein that shares a common rotary catalytic mechanism with F<sub>o</sub>F<sub>1</sub>  
3 ATP synthase. When powered by ATP hydrolysis, the V<sub>1</sub> moiety rotates the central rotor  
4 against the A<sub>3</sub>B<sub>3</sub> hexamer, composed of three catalytic AB dimers adopting different  
5 conformations (AB<sub>open</sub>, AB<sub>semi</sub>, and AB<sub>closed</sub>). Here we have determined the atomic models  
6 of 18 catalytic intermediates of the V<sub>1</sub> moiety of V/A-ATPase under different reaction  
7 conditions by single particle Cryo-EM, which revealed that the rotor does not rotate  
8 immediately after binding of ATP to the V<sub>1</sub>. Instead, three events proceed simultaneously  
9 with the 120° rotation of the shaft: hydrolysis of ATP in AB<sub>semi</sub>, zipper movement in AB<sub>open</sub>  
10 by the binding ATP, and unzipper movement in AB<sub>closed</sub> with release of both ADP and Pi.  
11 This indicates the unidirectional rotation of V/A-ATPase by a ratchet-like mechanism owing  
12 to ATP hydrolysis in AB<sub>semi</sub>, rather than the power stroke model proposed previously for F<sub>1</sub>-  
13 ATPase.

14

## 1 **Main**

2 The proton translocation ATPase/synthase family includes F-type enzymes found in  
3 eubacteria, mitochondria, and chloroplasts, and the V/A type enzymes found in archaea and  
4 some eubacteria<sup>1-5</sup> (Fig. 1a). These ATPases produce the majority of cytosolic ATP from  
5 ADP and *Pi* using energy derived from the transmembrane proton motive force generated by  
6 cellular respiration<sup>6</sup>. These ATPases share a common molecular architecture, consisting of  
7 a hydrophilic  $V_1/F_1$  moiety responsible for ATP hydrolysis or synthesis, and a hydrophobic  
8  $V_o/F_o$  domain housing a proton translocation channel<sup>7-9</sup>. The chemical reaction (ATP  
9 hydrolysis/synthesis) in  $V_1/F_1$  is tightly associated with proton movement through  $V_o/F_o$   
10 using a rotary catalytic mechanism, where both reactions are coupled by rotation of the  
11 central rotor complex relative to the surrounding stator apparatus, which includes the ATPase  
12 active hexamer<sup>6,10,11</sup> (Fig. 1b).

13 The V/A-ATPase from the thermophilic bacterium, *Thermus thermophilus* (*Tth*) is one of  
14 the best-characterized ATP synthases<sup>3,12</sup>. The overall architecture and subunit composition  
15 of V/A-ATPase is more similar to that of the eukaryotic V-ATPase, rather than F-type  
16 ATPase. However, the *Tth* V/A-ATPase has a simpler subunit structure than eukaryotic V-  
17 ATPase and shares the ATP synthase function of F-type ATPase<sup>13</sup> (Fig. 1a). The  $V_1$  moiety

1 of *Tth* V/A-ATPase ( $A_3B_3D_1F_1$ ) is an ATP driven rotary motor where the central DF shaft  
2 rotates inside the hexameric  $A_3B_3$  containing three catalytic sites, each composed of an AB  
3 dimer. The  $V_o$  domain ( $E_2G_2d_1a_1c_{12}$ ) is composed of stator parts including the  $a$  subunit  
4 and two EG peripheral stalks and the  $d_1c_{12}$  rotor complex, which consists of a central rotor  
5 complex with the DF subunits of  $V_1$ <sup>14-16</sup>. When ATP hydrolysis by  $A_3B_3$  powers the DF  
6 shaft, the reverse rotation of the central rotor complex drives proton translocation in the  
7 membrane-embedded  $V_o$  domain (Fig. 1b).

8 According to the binding change mechanism of ATP synthesis<sup>6</sup>, the three catalytic sites  
9 in ATP synthases are in different conformations but interconvert sequentially between three  
10 different conformations as catalysis proceeds. Indeed, our previous structure demonstrated  
11 that the  $A_3B_3$  hexamer in the V/A-ATPase adopts an asymmetrical structure composed of  
12 three different AB dimers, termed open ( $AB_{open}$ ), semi-closed ( $AB_{semi}$ ), and closed  
13 ( $AB_{closed}$ )<sup>16,17</sup>. The asymmetrical structure of the  $V_1$  implies that sequential interconversion  
14 between these three different AB dimers is synchronized with rotation of the central DF shaft.  
15 Experimental studies using specific rotational probes attached to DF, revealed that ATP-  
16 driven rotation of the central shaft was unidirectionally clockwise when viewed from the  $V_1$   
17 side<sup>10</sup>. At low ATP concentrations where ATP binding is rate-limiting, rotation proceeds

1 in steps of  $120^\circ$ , commensurate with the three catalytic sites of AB dimers<sup>18</sup>. When using  
2 40 nm gold beads with almost negligible viscous resistance,  $V_1$  also pauses every  $120^\circ$  even  
3 at a ATP concentration around  $K_m$  without a sign of substeps<sup>19</sup>. These single-molecule  
4 experiments on  $V_1$  suggest that the both catalytic events, ATP hydrolysis and product (ADP  
5 and  $P_i$ ) release occur at an individual ATP binding position, and imply the presence of  
6 chemo-mechanically stable catalytic intermediates (Fig. 1c and Supplementary Fig. 1).

7 However, single-molecule observation experiments only allow us to see the motion of the  
8 shaft to which the observation probe is bound, and do not tell us what events are occurring at  
9 each catalytic site. To elucidate the entire rotational mechanism of V/A-ATPase, we must  
10 determine the structures of catalytic intermediates of the rotary ATPase during rotation.  
11 There are many reaction intermediates of the enzyme during turnover, and this structural  
12 heterogeneity makes successful crystallization of a specific state very challenging.

13 Technological breakthroughs in single particle Cryo-EM, such as the development of  
14 direct electron detectors, and advances in image processing and automation<sup>20,21</sup>, have  
15 triggered a revolution in structural biology, making this the technique of choice for large and  
16 dynamic complexes unsuitable for crystallization. In addition, by freezing Cryo-EM grids  
17 at different time points or under different reaction conditions, it is possible to trap

1 intermediate states and thus build up a picture of the chemo-mechanical cycle of biological  
2 macromolecular complexes step by step. To date, there are few examples of studies that  
3 have successfully captured such details of a catalytic cycle at atomic resolution using Cryo-  
4 EM<sup>22,23</sup>.

5 Here we report several key, and thus far uncharacterized, intermediate states of V/A-  
6 ATPase, obtained under different reaction conditions. Comparison of these structures  
7 provides insight into a novel cooperativity between the three catalytic sites and demonstrates  
8 a rotary catalytic mechanism powered by ATP hydrolysis.

9

## 10 **Results**

### 11 **Sample preparation for Cryo-EM structural analysis**

12 We previously determined the Cryo-EM structures of the wild-type V/A-ATPase containing  
13 an ADP in the catalytic site of AB<sub>closed</sub><sup>16,17</sup>. The V/A-ATPase bound to the inhibitory ADP  
14 exhibits no ATPase activity until the ADP is removed<sup>13,16,24</sup>. Partial ADP removal from  
15 AB<sub>closed</sub> is possible by dialysis against an EDTA-phosphate buffer, but it is difficult to obtain  
16 a homogenous nucleotide-free V/A-ATPase after such a treatment, due to the high binding  
17 affinity of the ADP to AB<sub>closed</sub> (Supplementary Table 1). To obtain a homogeneous ATPase

1 active enzyme, mutant V/A-ATPase (A/S232A, T235S) with reduced nucleotide-binding  
2 affinity was purified from *T. thermophilus* membranes<sup>10</sup>. The mutated V/A-ATPase  
3 exhibits higher  $K_m$  values for nucleotide in both the ATP hydrolysis and synthesis reactions  
4 than the wild-type enzyme, but the enzymatic and rotational properties are almost the same  
5 as those of the wild-type enzyme<sup>24</sup>. The mutated V/A-ATPase is fully activated for ATPase  
6 activity after EDTA/phosphate dialysis; no ADP or ATP was found in the enzyme by  
7 quantitative analysis of nucleotides (Supplementary Fig. 2 and Table 1). We incorporated  
8 the nucleotide-free V/A-ATPase into nanodiscs comprising the MSP1E3D1 scaffold protein  
9 and DMPC. The resulting V/A-ATPase obeys simple Michaelis-Menten kinetics and exhibits  
10 ATPase activity of  $22 \text{ s}^{-1}$  and the  $K_m$  of  $394 \mu\text{M}$  ATP (Supplementary Fig. 2b).

11 The nucleotide-free V/A-ATPase (Nucfree) was used for cryo-grid preparation under  
12 different ATPase reaction conditions (Supplementary Fig. 1c). Results of the structural  
13 analysis of the protein under each set of reaction conditions are summarized in  
14 Supplementary Figs. 3a-d.

### 15 **The structures of V/A-ATPase without nucleotide ( $V_{\text{nucfree}}$ )**

16 The flow charts showing image acquisition and reconstitution of the 3D structure of V/A-  
17 ATPase without nucleotide are summarized in Supplementary Fig. 3a. We obtained

1 structures of three rotational states of V/A-ATPase without nucleotide; state1 at 3.1 Å, state2  
2 at 4.7 Å, and state 3 at 6.3 Å resolution, with the DF shaft positions differing by 120° in each  
3 case (Fig. 2). Using signal subtraction of the V<sub>o</sub> domain, we achieved resolution of 3.0 and  
4 4.1 Å for the V<sub>1</sub> moiety including half of the EG stalk in state1 and 2, allowing us to build  
5 atomic models of the V<sub>1</sub> domain of these states.

6 The three AB dimers in the V<sub>1</sub> moiety adopted open (AB<sub>open</sub>), semi-closed (AB<sub>semi</sub>), and  
7 closed (AB<sub>closed</sub>) states, respectively (Fig. 2b and c). The tip of the C-terminal helix bundle  
8 (CHB) of A<sub>open</sub> is in contact with the C-terminal helix of the D subunit, and the wide part of  
9 the CHB of B<sub>open</sub> is in contact with the N-terminal helix of the D subunit, respectively  
10 (Supplementary Fig. 4 a-c). The AB<sub>semi</sub> and AB<sub>closed</sub> also interact with the coiled-coil of  
11 subunit D in specific regions of the CHB, respectively (Supplementary Fig. 4 d-g).

12 The differences in the structures of the three AB dimers when superimposed on the β  
13 barrel domains of both A and B subunits are the result of movement of the N-terminal bulge  
14 domain, the nucleotide binding domain (NB) of the A subunit and the CHBs of both the A  
15 and B subunits (Fig. 2d). When comparing the structure of AB<sub>open</sub> and AB<sub>semi</sub>, both the NB  
16 and CHB of the A<sub>semi</sub> are in closer proximity to B<sub>semi</sub> than B<sub>open</sub>, resulting in a closed structure  
17 of AB<sub>semi</sub> (Fig. 2c and d). The structure of B<sub>open</sub> is very similar to B<sub>semi</sub>, as shown in Fig.



1 2d. In the  $AB_{\text{closed}}$ , both the CHB and NB domains of  $A_{\text{closed}}$  are in closer proximity to  $B_{\text{closed}}$ ,  
2 and the CHB of  $B_{\text{closed}}$  moves to  $A_{\text{closed}}$ , resulting in the more closed structure of  $AB_{\text{closed}}$   
3 compared to  $AB_{\text{semi}}$  (Fig. 2c and d).

4 In the  $AB_{\text{closed}}$  and  $AB_{\text{semi}}$  dimers, densities for the catalytic side chains are well resolved,  
5 but no density corresponding to nucleotide was observed (Fig. 3a). Hereafter we refer to  
6 the structure as the  $V_{\text{nucfree}}$ . The structure of  $V_{\text{nucfree}}$  is very similar to the previously reported  
7 ADP inhibited structure<sup>16,17</sup>. For state1, the *rmsd* value for the  $C_{\alpha}$  chains of  $A_3B_3DF$  of the  
8  $V_{\text{nucfree}}$  and ADP inhibited structures is 1.98 Å (Supplementary Fig. 5). In addition, the  
9  $V_{\text{nucfree}}$  is also similar to the structures under saturated-ATP condition determined in this  
10 study, with the positions of the catalytic side chains almost identical in both cases  
11 (Supplementary Fig. 6). This indicates that the  $V_1$  moiety adopts the same conformation,  
12 including the arrangement of the DF shaft in the  $A_3B_3$  and the geometry of the catalytic side  
13 chains, irrespective of the presence or absence of bound ATP.

14 In the density maps obtained for state1 of  $V_{\text{nucfree}}$ , the CHB of the AB dimers were slightly  
15 blurred, likely due to structural heterogeneity. To classify the probable substates of state1,  
16 we performed focused 3D classification using a mask covering  $AB_{\text{open}}$  and  $B_{\text{semi}}$   
17 (Supplementary Fig. 3a). We identified an atomic resolution structure of the original state1

1 from 39,902 particles at 3.1 Å resolution and another substate from 24,101 particles at 3.1 Å  
2 resolution. We termed the substates reconstructed from these major particle classes as state1-  
3 1 and state1-2, respectively. The atomic model initially constructed as state1 is identical to  
4 the atomic model of state1-1. The structures of the sub-states are very similar, with most  
5 differences due to the movement of the CHB of the A and B subunits. Therefore, we  
6 quantified the difference in the structure of the CHB observed when the structures were  
7 superimposed on the N-barrel domain (Supplementary Table 2 and 3). Substates were also  
8 obtained under other reaction conditions (see below) and the *rmsd* values shown in  
9 Supplementary Table 2 and 3 are used to discuss which subunits are responsible for the  
10 differences in structure of the substates obtained under different reaction conditions.

### 11 **Structures obtained at a saturating ATP concentration**

12 Cryo-grids were prepared using a reaction mixture of Nucleotide-free V/A-ATPase,  
13 containing the regenerating system and ATP at a saturating concentration of 6 mM. The  
14 reaction mixture was incubated for 120 sec at 25 °C, and then loaded onto a holey grid,  
15 followed by flash freezing.

16 We determined three rotational states followed by focused refinement using a V<sub>1</sub>EG mask  
17 for each state (Supplementary Fig. 3b). In the density maps obtained for each state, the

1 amino acid residues of the nucleotide binding sites in both AB<sub>closed</sub> and AB<sub>semi</sub> were well  
2 resolved, but the CHB domains of the AB dimers were blurred due to structural heterogeneity,  
3 as with the V<sub>nucfree</sub>. For state1, we identified an atomic resolution structure of state1-1 from  
4 40,831 particles at 3.1 Å resolution and state1-2 from 28,801 particles at 3.2 Å resolution by  
5 further 3D classification without alignment (Supplementary Fig. 3b). The same  
6 classification analysis was performed for state2 and state3, yielding state 2-1 (3.0 Å  
7 resolution) and state 2-2 (3.4 Å resolution), and state 3-1 (3.0 Å resolution) and state 3-2 (3.4  
8 Å resolution) respectively. In these structures, nucleotide densities have been identified in  
9 the three catalytic sites. Hereafter, we refer to the structures obtained at ATP saturating  
10 condition as V<sub>3nuc</sub>.

11 The structure of AB<sub>open</sub> of V<sub>3nuc</sub> state1-1 is almost identical to that of V<sub>nucfree</sub> state1-1  
12 (Supplementary Fig. 6). This is confirmed by the fact that the *rmsd* values in the CHB of  
13 A<sub>open</sub> and B<sub>open</sub> for V<sub>3nuc</sub> state1-1 and V<sub>nucfree</sub> are less than 1 Å (Supplementary Table 2 and 3).  
14 The AB<sub>open</sub> of state1-2 adopts a slightly more closed conformation compared to that of state1-  
15 1, which results from a movement of CHB of B<sub>open</sub> towards the β-barrel domain (Fig. 4c).  
16 Nevertheless, the AB<sub>open</sub> of V<sub>3nuc</sub> with bound ATP retains the interaction with the DF shaft,  
17 indicating that ATP binding to the AB<sub>open</sub> does not move the DF shaft.

1 The AB<sub>semi</sub> in state1-2 has a more closed structure than that in state1-1 mainly due to the  
2 movement of CHB in B<sub>semi</sub> (Fig. 4b, Supplementary Table 3). In summary, V<sub>3nuc</sub> state1-2 has  
3 a more closed structure than state1-1 due to the movement of the CHB of both A<sub>semi</sub> and B<sub>semi</sub>,  
4 but the slightly closed conformation of state1-2 is independent of ATP binding to the AB<sub>open</sub>.

### 5 **Structures of the catalytic sites at AB dimers of V<sub>3nuc</sub>**

6 In both state1-1 and state1-2 structures obtained under ATP saturating conditions, a bound  
7 ATP molecule is clearly observed in the catalytic site of AB<sub>open</sub> (Fig. 3b and Supplementary  
8 Fig. 7c). The catalytic sites in the AB<sub>closed</sub> and AB<sub>semi</sub> in both the state1-1 and state1-2 also  
9 contained density corresponding to an ATP molecule, and in these cases the associated  
10 magnesium ions were visible (Fig. 3b and Supplementary Fig. 7a-b). In the V<sub>3nuc</sub> structure,  
11 we did not find density corresponding to nucleotides between the D and A subunits as  
12 reported in a previous paper<sup>25</sup> (Supplementary Fig. 8).

13 In the catalytic site of AB<sub>semi</sub> of V<sub>3nuc</sub>, the density of each nucleotide phosphate atom was  
14 easily identifiable (Supplementary Fig. 7b), indicating that the ATP molecule occupies the  
15 catalytic site in AB<sub>semi</sub>. The protein structure is sufficiently clear to also provide a detailed  
16 picture of the configuration of the catalytic side chains (Figs. 5a-c). The  $\gamma$ -phosphate of ATP  
17 and the magnesium ion are coordinated by the A/K234 and A/S235 residues on the P-loop,

1 which contains the conserved nucleotide-binding motif<sup>7,26</sup>. The aromatic ring of A/F230,  
2 not conserved in F type ATPase, is oriented away from the triphosphate moiety, allowing  
3 access of the guanidium group to the arginine finger (Supplementary Fig. 9). Considering  
4 clear EM density for the  $\gamma$ -phosphate of the ATP bound in AB<sub>semi</sub>, hydrolysis of ATP is  
5 unlikely to proceed in AB<sub>semi</sub>.

6 The nucleotide-binding site of the AB<sub>closed</sub> is shown in Fig. 5b. The geometry of ATP  
7 binding in AB<sub>closed</sub> is very similar to that found in the AB<sub>semi</sub>, however, the carbonyl group of  
8 A/E257 is closer to the  $\gamma$ -phosphate by about 1 Å than AB<sub>semi</sub>. In state1-2 of V<sub>3nuc</sub>, the  $\gamma$ -  
9 phosphate of ATP bound to the AB<sub>closed</sub> appears to be separated from  $\beta$ -phosphate when a  
10 relatively high density threshold is used (Supplementary Fig. 10). These findings strongly  
11 suggest that ATP bound to AB<sub>closed</sub> is either already hydrolyzed or in the process of being  
12 hydrolyzed. The state of ATP in AB<sub>closed</sub> is discussed further in Supplementary text.

13 In the nucleotide-binding site of the AB<sub>open</sub> of V<sub>3nuc</sub>, the adenosine moiety of ATP is  
14 occluded as in the AB<sub>semi</sub> and AB<sub>closed</sub>, with A/F415, A/Y500, and A/V236 forming the  
15 adenine binding pocket, however, the hydrogen bonding of the ribose moiety to the side chain  
16 of B/N363 is lost due to movement of the CHB of A<sub>open</sub> (Fig. 5c). Unlike in the AB<sub>closed</sub>  
17 and AB<sub>semi</sub>, the phenyl group of A/230F in the AB<sub>open</sub> is closer to the tri-phosphate group of

1 ATP due to torsion of the main chain, resulting in formation of a hydrophobic barrier between  
2 the catalytic side chains and the triphosphate moiety of ATP (Supplementary Fig. S9).  
3 Compared with AB<sub>semi</sub>, the side chains of catalytic residues A/E257, A/R258, and B/R360 of  
4 AB<sub>open</sub> are much further away from the  $\gamma$ -phosphate of ATP (10.0, 10.0 and 7.1 Å,  
5 respectively. Consequently, the configuration of the catalytic residues in the nucleotide-  
6 binding site of AB<sub>open</sub> is not appropriate for hydrolysis of the bound ATP. Instead, the  
7 bound ATP has the potential to zipper the AB interface via interaction with the surrounding  
8 catalytic residues, which ultimately results in the transition of AB<sub>open</sub> to a more closed form  
9 via a typical zipper conformational change.

#### 10 **Structures of V/A-ATPase waiting for ATP to bind**

11 To determine the ATP-waiting structure of V/A-ATPase, we prepared a cryo-grid with a  
12 reaction mixture containing 4  $\mu$ M enzyme, 50  $\mu$ M ATP, and the ATP regeneration system,  
13 pre-incubated for 300 sec. We reconstructed three rotational states (state1, 2.7 Å, state2, 3.3  
14 Å, and state3 3.6 Å resolution) from the single-particle images of the holo-complex and three  
15 rotational states of V<sub>1</sub>EG (state1, 2.8 Å, state2, 3.1 Å, and state3, 2.8 Å) by focused masked  
16 refinement. For state1, two substates (state1-1, 2.9 Å and state1-2, 3.0 Å) were separated by  
17 focused classification using AB<sub>open</sub> and AB<sub>semi</sub> masks (Supplementary Fig. 3c).

1 In both  $AB_{\text{semi}}$  and  $AB_{\text{closed}}$  of state1-1, apparent density of ATP-magnesium was observed,  
2 but the density of the  $\gamma$ -phosphate at the  $AB_{\text{closed}}$  is weaker than that at the  $AB_{\text{semi}}$  (Fig. 3c  
3 and Supplementary Figs. 7a and b). In contrast, density was not observed in the nucleotide-  
4 binding site of  $AB_{\text{open}}$ . For state1-2, as in state1-1, nucleotides are present in both  $AB_{\text{semi}}$  and  
5  $AB_{\text{closed}}$ , while  $AB_{\text{open}}$  is empty. Hereafter we refer to the structure as  $V_{2\text{nuc}}$ .

6 The overall structure and geometry of the catalytic residues of state1-1 of  $V_{2\text{nuc}}$  are largely  
7 identical to state1-1 of  $V_{\text{nucfree}}$  and  $V_{3\text{nuc}}$  (Supplementary Fig. 11). This structural similarity  
8 between  $V_{2\text{nuc}}$ ,  $V_{\text{nucfree}}$ , and  $V_{3\text{nuc}}$  is confirmed by the low *rmsd* values when comparing the  
9 CHB of the A and B subunits of these structures (Supplementary Table 2 and 3). The  
10 similarity of the structures of these substates indicates that the structural polymorphism of  $V_1$   
11 moiety is independent of the binding of ATP to AB dimers.

## 12 **Structures obtained at a saturating concentration of ATP $\gamma$ S ( $V_{\text{prehyd}}$ )**

13 The  $V_1$ -ATPase from *T. thermophilus* is capable of hydrolyzing ATP $\gamma$ S, however, the  
14 turnover rate of ATP $\gamma$ S is much lower than that of ATP due to the decrease in hydrolysis  
15 rate<sup>18</sup> (Supplementary Fig. 2d). Thus, pre-hydrolysis structures of V/A-ATPase can be  
16 obtained at 4 mM ATP $\gamma$ S. The cryo-grid was prepared by blotting of the reaction mixture  
17 comprising Nucleotide-free V/A-ATPase and 4 mM of ATP $\gamma$ S in the absence of the

1 regenerating system in order to exclude any effect of regenerated ATP produced from  
2 hydrolyzed ATP $\gamma$ S. We reconstructed three rotational states from the acquired EM images  
3 using the CRYOARM300 (JEOL). After the focused masked refinement of the V<sub>1</sub>EG domain,  
4 we obtained atomic resolution structures of each state (state1, 2.7 Å, state2, 3.4 Å, and state3,  
5 3.6 Å), respectively (Supplementary Fig. 3d). We refer to these structures as V<sub>prehyd</sub>. For  
6 state1, two sub-states, state1-1 and state1-2, were obtained at 2.7 and 2.9 Å resolution  
7 respectively, by focused classification using a mask with AB<sub>open</sub> and AB<sub>semi</sub> (Supplementary  
8 Fig. 3d). For the AB<sub>open</sub> of V<sub>prehyd</sub>, bound ATP $\gamma$ S is clearly observed in the catalytic site,  
9 which has an almost identical structure to that of the ATP bound state of V<sub>3nuc</sub> (Fig. 3b).

10 The nucleotide-binding sites of the AB<sub>closed</sub> and AB<sub>semi</sub> of V<sub>prehyd</sub> are almost identical to  
11 those of V<sub>3nuc</sub>, respectively, as shown in Fig. 5. The  $\gamma$ -phosphate group of the bound ATP $\gamma$ S  
12 molecule in the AB<sub>semi</sub> is well resolved as seen in for ATP in V<sub>3nuc</sub> and V<sub>2nuc</sub> (Figs. 3d and  
13 Supplementary Fig. 7b). In contrast, the density of  $\gamma$ -phosphate of ATP $\gamma$ S at the AB<sub>closed</sub> is  
14 faint (Supplementary Fig. 7a), suggesting that the ATP $\gamma$ S in the AB<sub>closed</sub> has already been  
15 hydrolyzed and the bound nucleotide in the AB<sub>closed</sub> is ADP. This indicates that the AB<sub>semi</sub> is  
16 in the pre-hydrolysis conformation, waiting for ATP hydrolysis.

17



## 1 **Discussion**

### 2 **V/A-ATPase has a very similar structure irrespective of the nucleotide binding status.**

3 We have obtained catalytic intermediates of  $V_1$  moiety,  $V_{\text{nucfree}}$ ,  $V_{3\text{nuc}}$ ,  $V_{2\text{nuc}}$ , and  $V_{\text{prehyd}}$ , with  
4 different nucleotide occupancy. Despite the different nucleotide occupancy of these  
5 structures, their overall conformations are very similar. For instance, the *rmsd* of the  $C_\alpha$   
6 chains of  $A_3B_3$  in  $V_{\text{nucfree}}$  and  $V_{3\text{nuc}}$  state1-1 is 1.98Å. In addition, the relative position of the  
7 central DF shaft within the asymmetric  $A_3B_3$  is almost the same in the  $V_{\text{nucfree}}$  and  $V_{3\text{nuc}}$   
8 structures. These findings demonstrate that the configuration between the DF shaft and  
9 individual AB dimers is independent of the state of nucleotide occupancy of each AB dimer.  
10 In other words, the structure of the  $V_1$  moiety adopts three rotational states, 1, 2, and 3, during  
11 continuous ATP hydrolysis, with the conformational changes in the  $A_3B_3$  hexamer driven by  
12 ATP hydrolysis, being discrete rather than continuous.

### 13 **Chemo-mechanical cycle of the V/A-ATPase powered by ATP hydrolysis**

14 The  $V_{3\text{nuc}}$  structure, obtained under ATP saturation conditions shows all three catalytic  
15 sites occupied by ATP or the products of hydrolysis (ADP +  $P_i$ ). Since the hydrolyzed  $P_i$   
16 is clearly visible in the  $AB_{\text{closed}}$  of  $V_{3\text{nuc}}$  (Supplementary Fig. 10), it is assumed that  $V_{3\text{nuc}}$  is  
17 the structure before dissociation of  $P_i$  from the catalytic site in  $AB_{\text{closed}}$ . We also obtained the

1  $V_{2nuc}$  structure in which ATP and product(s) are bound to  $AB_{semi}$  and  $AB_{closed}$ , respectively,  
2 but  $AB_{open}$  is empty. The  $V_{2nuc}$  is therefore assumed to be the structure of the protein awaiting  
3 ATP binding to  $AB_{open}$ . When using ATP $\gamma$ S as a substrate, which has a very slow hydrolysis  
4 rate, the high-resolution atomic structure of the  $V_1$  moiety allowed visualization of ATP $\gamma$ S  
5 molecules bound to the catalytic sites of  $AB_{open}$  and  $AB_{semi}$ , as well as identification of the  
6 hydrolyzed ATP $\gamma$ S at the  $AB_{closed}$ . The  $V_{prehyd}$  reveals both that the  $AB_{closed}$  adopts the post-  
7 hydrolysis state where the product of phosphate ( $P_i$ ) is dissociated, and that the  $AB_{semi}$  is  
8 awaiting ATP hydrolysis.

9 The structures provide important insights into the chemo-mechanical cycle of V/A-  
10 ATPase. The V/A-ATPase undergoes a unidirectional conformational change from state1 to  
11 state2 to state3 when powered by ATP. Thus,  $V_{3nuc}$  of state1, in which three catalytic sites  
12 are already occupied by nucleotides, should change to state2 of  $V_{2nuc}$ , following ATP  
13 hydrolysis at  $AB_{semi}$ , and the subsequent or simultaneously dissociation of ADP and  $P_i$  by  
14 the discrete structural transition of  $AB_{closed}$  to  $AB_{open}$  (Fig. 6). This demonstrate that rotation  
15 of the rotary ATPase proceeds via the tri-site model with the protein progressing through a  
16 two nucleotide bound state and a three nucleotide bound state, settling the long-standing

1 debate on whether the bi-site model or tri-site model is appropriate for rotary ATPases<sup>5,6,27-</sup>  
2 <sup>30</sup>.

3 Based on previous single molecular observation experiments for both F<sub>1</sub>- and V<sub>1</sub>-ATPase,  
4 ATP binding onto the enzyme directly triggers the first 120° rotation step of the DF  
5 shaft<sup>18,19,30</sup> (Supplementary Fig. 1a). In light of our findings presented here, this scheme  
6 needs to be redrawn; the rotor does not immediately travel 120° as a result of ATP binding  
7 to enzyme.

8 The next catalytic event after ATP binding is ATP hydrolysis in AB<sub>semi</sub>. Each  
9 conformational change, from AB<sub>open</sub> to AB<sub>semi</sub>, AB<sub>semi</sub> to AB<sub>closed</sub>, and AB<sub>closed</sub> to AB<sub>open</sub>  
10 occurs simultaneously, with the rotation of the shaft, and with the hydrolysis of ATP in the  
11 AB<sub>semi</sub> and release of products (ADP and P<sub>i</sub>) from the AB<sub>closed</sub> (Fig. 6 and Supplementary  
12 Movie 1). This is in marked contrast to the classical rotary model, where catalytic events  
13 occur in sequence at the three catalytic sites, until now the broadly accepted mechanism of  
14 action of the F<sub>1</sub>-ATPase<sup>6,27,31,32</sup>.

15 In the V<sub>2nuc</sub> and V<sub>3nuc</sub>, two sub-states, state1-1 and state1-2 were identified. These  
16 substates were also identified in V<sub>nucfree</sub>, thus the conformational dynamics of the V<sub>1</sub> moiety  
17 are independent of ATP binding. In other words, state1-1 and state1-2 are in thermally

1 equilibrium state, irrespective of nucleotide occupancy in each catalytic site. Both  $AB_{\text{semi}}$  and  
2  $AB_{\text{open}}$  in state1-2 adopt more closed structures than those in state1-1, suggesting that state1-  
3 2 of  $V_{3\text{nuc}}$  is likely an intermediate structure just prior to the  $120^\circ$  rotation step of the DF shaft.  
4 Compared to state1-2 of  $V_{3\text{nuc}}$ , state1-2 of  $V_{\text{prehyd}}$  exhibits slightly more closed structures of  
5  $AB_{\text{open}}$  and  $AB_{\text{semi}}$  (Supplementary Fig. 13), likely to be associated with the progress of the  
6 catalytic reaction in  $AB_{\text{closed}}$ , i.e., the dissociation of the phosphate. In this respect, state1-2  
7 of  $V_{\text{prehyd}}$  may be another reaction intermediate structure in which the  $P_i$  in the  $AB_{\text{closed}}$  is  
8 released prior to the  $120^\circ$  step (Supplementary Fig. 14).

### 9 **Rotation Mechanism of the V/A-ATPase**

10 Based on the catalytic intermediates of the  $V_1$  moiety of V/A-ATPases obtained under four  
11 different reaction conditions, we propose a model for the ATP-driven rotation mechanism of  
12 V/A-ATPases.

13 When ATP binds to  $V_{\text{nucfree}}$ , which is in a stable initial state (ground state), the enzyme  
14 transits into the steady state for ATP hydrolysis (Fig. 7, *upper row*). The  $V_{3\text{nuc}}$  structure is  
15 formed by binding of ATP to the  $AB_{\text{open}}$  of  $V_{2\text{nuc}}$  but the binding of ATP itself does not cause  
16 structural transitions between AB dimers associated with the  $120^\circ$  step of the DF shaft.

1 In the  $V_{3nuc}$  structure, where nucleotides are bound to all three AB dimers, three distinct  
2 but associated catalytic events occur at the three AB dimers simultaneously and these events  
3 are coupled to the first  $120^\circ$  rotation step of the DF shaft. One of the driving events for this  
4 transition is the conformational change from the ATP-bound  $AB_{open}$  to the more closed  
5  $AB_{semi}$ , which can be explained by a zipper motion of  $AB_{open}$  occurring upon ATP binding.  
6 From our structures, a comparison between  $AB_{open}$  and  $AB_{semi}$  implies that new hydrogen  
7 bonds form between the triphosphate moiety of ATP and the surrounding side chain groups  
8 of B/R360, A/258R, A/257E, and A/K234. (Fig. 5).

9 The  $V_{prehyd}$  structures indicate that the ATP bound to  $AB_{semi}$  is awaiting hydrolysis. The  
10 conformational change from  $AB_{semi}$  to  $AB_{closed}$  should occur spontaneously because it  
11 involves ATP hydrolysis, an exergonic reaction. In contrast, ADP bound to  $AB_{closed}$  hampers  
12 the unzipper motion in  $AB_{closed}$ , thereby preventing the overall structural transition of the  $V_1$   
13 moiety. This is supported by the fact that V/A-ATPase adopts the ADP inhibited state in  
14 which ADP is entrapped in  $AB_{closed}$  (Fig. 7, upper line). The enzyme in the ADP-inhibited  
15 state does not show ATP hydrolysis activity even at saturated ATP concentration<sup>13, 16</sup>.

16 In summary, the ATP-driven unidirectional rotation of V/A-ATPase proceeds by a  
17 discrete structural transition between the three rotational states, i.e., the potential barrier to

1 the structural transition of  $AB_{\text{closed}}$  to  $AB_{\text{open}}$ , accompanied by release of ADP and  $P_i$ , is  
2 overcome by both a zipper motion of  $AB_{\text{open}}$  by the bound ATP and ATP hydrolysis in  $AB_{\text{semi}}$ .  
3 Since the ATP hydrolysis reaction is a heat dissipation process, the structural transition of  
4  $AB_{\text{semi}}$  to  $AB_{\text{closed}}$  associated with the ATP hydrolysis occurs spontaneously and irreversibly,  
5 resulting in a unidirectionality of the  $120^\circ$  steps of rotor. In other words, our model explains  
6 the unidirectional rotation by a ratchet-like mechanism driven by ATP hydrolysis, rather than  
7 the power stroke model proposed previously for  $F_1$ -ATPase<sup>5,33</sup>.

8 V/A-ATPase and  $F_0F_1$  are molecular machines based on the same construction principle,  
9 and thus are likely to share the same rotary mechanism. Importantly, for the thermophilic  $F_1$ ,  
10 the first  $120^\circ$  rotation step also includes  $\sim 80^\circ$  and  $\sim 40^\circ$  substeps, suggesting the existence of  
11 at least one additional catalytic intermediate of  $F_1$ <sup>5,27,34</sup>. A recent structural study of  
12 thermophilic  $F_1$ -ATPase indicated a possible intermediate structure responsible for the  
13 substeps<sup>32</sup>. In the V/A-ATPase, any intermediate structure containing phosphate after ADP  
14 or  $P_i$  release is likely to be an unstable state, and therefore studies on the ATP driven rotation  
15 of V/A-ATPase have failed to reveal the presence of any substep<sup>19</sup>.

16

## 1 **Online Methods**

### 2 **Preparation of *Tth* V/A-ATPase for Biochemical assay and Cryo-EM imaging.**

3           The *Tth* V/A-ATPase containing His3 tags on the C-terminus of each c subunit and  
4 the TSSA mutation (S232A and T235S) on the A subunit was isolated from *Thermus*  
5 *thermophilus* membranes as previously described<sup>24</sup> with the following modifications. The  
6 enzyme, solubilized from the membranes with 10 % Triton X-100 was purified by Ni<sup>2+</sup>-NTA  
7 affinity with 0.03 % dodecyl- $\beta$ -D-maltoside (DDM). For bound nucleotide removal, the  
8 eluted fractions containing *Tth* V/A-ATPase were dialyzed against 200 mM Sodium  
9 phosphate, pH 8.0, 10 mM EDTA, and 0.03% DDM over night at 25°C with three buffer  
10 changes, followed by dialysis against 20 mM Tris-Cl, pH 8.0, 1 mM EDTA, and 0.03% DDM  
11 (TE buffer) prior to anion exchange chromatography using a 6 ml Resource Q column (GE  
12 healthcare). The *Tth* V/A-ATPase was eluted by a linear NaCl gradient using a TE buffer (0-  
13 500 mM NaCl, 0.03% DDM). The eluted fractions containing *holo-Tth* V/A-ATPase were  
14 concentrated to ~ 10 mg/ml using Amicon 100 k molecular weight cut-off filters (Millipore).  
15 For nanodisc incorporation, the 1,2-Dimyristoyl-sn-glycero-3-phosphorylcholine (DMPC,  
16 Avanti) was used to form lipid bilayers in reconstruction as previously described<sup>16</sup>. Purified  
17 *Tth* V/A-ATPase solubilized in 0.03 % n-Dodecyl- $\beta$ -D-maltoside (DDM) was mixed with

1 the lipid stock and membrane scaffold protein MSP1E3D1 (Sigma) at a specific molar ratio  
2  $V_0V_1$ : MSP: DMPC lipid = 1: 4: 520 and incubated on ice for 0.5 h. Then, 200  $\mu$ L of Bio  
3 Beads SM-2 equilibrated with a wash buffer (20 mM Tris-HCl, pH8.0, 150 mM NaCl) was  
4 added to the 500  $\mu$ L mixture. After 2 hours incubation at 4°C with gentle stirring, an  
5 additional 300  $\mu$ L of Bio Beads was added and the mixture incubated overnight at 4°C to  
6 form the nanodiscs. The supernatant of the mixture containing nanodisc-*Tth* V/A-ATPase  
7 (nd-V/A-ATPase) was loaded onto the Superdex 200 Increase 10/300 column equilibrated  
8 with wash buffer. The peak fractions were collected, analyzed by SDS-PAGE and  
9 concentrated to ~4 mg/mL. The prepared *nd*-V/A-ATPase was immediately used for  
10 biochemical assay or cryo-grid preparation, since *nd*-V/A-ATPase aggregates within a few  
11 days.

## 12 **Biochemical assay**

13 The quantitative analysis of bound nucleotides of *Tth* V/A-ATPase was carried out  
14 using anion exchange high performance liquid chromatography<sup>13</sup>. Bound nucleotides were  
15 released from the enzyme by addition of 5  $\mu$ l of 60% perchloric acid to 50  $\mu$ l of the enzyme  
16 solution. Thereafter, the mixture was incubated on ice for 10 min. Then, 5  $\mu$ l of 5  
17 M  $K_2CO_3$  solution was added and the mixture incubated on ice for 10 min. The resulting



1 pellet was removed by centrifugation at 4°C. The supernatant was applied to a Cosmopak-  
2 200 column equilibrated with 0.1 M sodium-phosphate buffer (pH 7.0). The column was  
3 eluted isocratically with the same buffer at a flow rate of 0.8 ml/min. The nucleotide was  
4 monitored at 258 nm. The peak area was determined by automatic integration.

5 ATPase activity was measured at 25°C with an enzyme-coupled ATP-regenerating  
6 system, as described previously<sup>13</sup>. The reaction mixture contained 50 mM Tris-HCl (pH 8.0),  
7 100 mM KCl, different concentrations of ATP-Mg, 2.5 mM phosphoenolpyruvate (PEP), 50  
8 µg/ml pyruvate kinase (PK), 50 µg/ml lactate dehydrogenase, and 0.2 mM NADH in a final  
9 volume of 2 ml. The reaction was started by addition of 20 pmol *nd* V/A-ATPase to 2 ml  
10 of the assay mixture, and the rate of ATP hydrolysis monitored as the rate of oxidation of  
11 NADH determined by the absorbance decrease at 340 nm.

## 12 **Cryo-EM imaging of *Tth* V/A-ATPase.**

13 Sample vitrification was performed using a semi-automated vitrification device  
14 (Vitrobot, FEI). For *nd*-V/A-ATPase that underwent nucleotide removal, hereafter referred  
15 as nucfree *nd*-V/A-ATPase, 2.4 µl of sample solution at a concentration of 3 mg/ml (2 µM)  
16 was applied to glow discharged Quantifoil R1.2/1.3 molybdenum grid discharged by Ion  
17 Bombarder (Vacuum Device) for 1 min. The grid was then automatically blotted once from

1 both sides with filter paper for 6 s blot time. The grid was then plunged into a liquid ethane  
2 with no delay time.

3 The reaction basal buffer (RB buffer) containing 50 mM Tris-Cl, pH 8.0, 100 mM  
4 KCl, and 2 mM MgCl<sub>2</sub> was used for different reaction conditions. For saturated ATP or  
5 ATP waiting condition, 4 μM of nucfree *nd-V/A*-ATPase was mixed with same volume of  
6 x2 RB buffer containing 10 mM PEP, 200 μg/ml of PK, 12 mM or 100 μM of ATP-Mg. Then  
7 the mixtures were incubated for 120 sec or 300 sec at 25 °C, followed by blotting and  
8 vitrification, respectively. For the ATPγS saturated condition, 4 μM of nucfree *nd-V/A*-  
9 ATPase was mixed with the same volume of x2 RB buffer containing 8 mM ATPγS-Mg,  
10 then incubated for 300 sec at 25 °C, followed by the blotting and vitrification.

11 With the exception of the saturated ATPγS condition, cryo-EM imaging was  
12 performed with a Titan Krios (FEI/Thermo Fisher) operating at 300kV acceleration voltage  
13 and equipped with a direct K3 (Gatan) electron detector in electron counting mode (CDS).  
14 Data collection was carried out using SerialEM software<sup>35</sup> at a calibrated magnification of  
15 0.88 Å pixel<sup>-1</sup> (x 81,000) and total dose of 50.0 e<sup>-</sup> Å<sup>-2</sup> (or 1.0 e<sup>-</sup> Å<sup>-2</sup> per frame) (where e<sup>-</sup>  
16 specifies electrons) with total 5 s exposure time. The defocus range was -0.8 to -2.0 μm. The  
17 data were collected as 50 movie frames.

1 For the saturated ATP $\gamma$ S condition, Cryo-EM movie collection was performed with a  
2 CRYOARM 300 (JEOL) operating at 300 keV accelerating voltage and equipped with a K3  
3 (Gatan) direct electron detector, in electron counting mode (CDS) using the data collection  
4 software serialEM. The pixel size was 1.1 Å/pix (x60,000) and a total dose of 50.0 e<sup>-</sup> Å<sup>-2</sup>  
5 (1.0 e<sup>-</sup> Å<sup>-2</sup> per frame) with a total 3.0 s exposure time (50 frames) with a defocus range of -  
6 1.0 to -3.5 μm.

#### 7 **Image processing.**

8 Image processing steps for each reaction condition are summarized in Figure S3 A-  
9 D. Image analysis software, Relion 3.1 and Cryosparc 3.2, were used<sup>36,37</sup>. CTFFIND 4.1  
10 and MotionCor2 were used for CTF estimation and movie correction in Relion<sup>38,39</sup>. Topaz  
11 software was used for machine-learning based particle picking<sup>40</sup>. We started with 15,317  
12 movies for the nucleotide free enzyme (nucfree *nd-V/A*-ATPase), 13,164 movies for  
13 saturated ATP condition, 15,711 movies for saturated ATP condition, and 17,522 movies for  
14 ATP $\gamma$ S condition. The software used in the steps is indicated in the figure. Autopicking based  
15 on template matching or based on Topaz machine-learning resulted in 4,354,341 particles for  
16 the nucfree *nd-V/A*-ATPase, 2,300,834 particles for the ATP saturated condition, 1,671,397  
17 particles for the ATP waiting condition, and 4,677,284 particles for the ATP $\gamma$ S waiting

1 condition. Particles were extracted at 5x the physical pixel size from the movie-corrected  
2 micrographs and selected using 2D or 3D classification (nucfree nd-V/A-ATPase; 132,904  
3 particles, saturated ATP; 188,673 particles, ATP waiting; 186,928 particles, ATP $\gamma$ S; 197,960  
4 particles). The selected particles were extracted at full pixel size and subjected to 3D auto-  
5 refinement refollowed by CTF refinement by Bayesian polishing. Another round of 3D auto-  
6 refine, CTF refinement, and a final round of masked auto-refinement gave *holo*-V/A-ATPase  
7 maps at between 2.7 ~ 6.3 Å resolution. The membrane domain was visible but not  
8 particularly clear compared to the hydrophilic V<sub>1</sub> domain in a *holo*-enzyme map. This  
9 seemed to be due to the structural flexibility between the membrane domain and V<sub>1</sub> in the  
10 *holo*-enzyme. Focused refinement with signal subtraction targeting the V<sub>1</sub>EG region  
11 improved the map quality of the V<sub>1</sub>EG region (Figure S3A-D). The refinements provided the  
12 density maps for V<sub>1</sub>EG under each condition at 2.8 - 4.1 Å resolution. After the focused  
13 refinement, masked classification on A<sub>open</sub> and B<sub>semi</sub> subunits was carried out to classify the  
14 conformational differences. Resolution was based on the gold standard Fourier shell  
15 correlation = 0.142 criterion.

## 16 **Model building and refinement.**

1 To generate the atomic model for the V<sub>1</sub>EG region of V/A-ATPase, the individual subunits  
2 of the V<sub>1</sub>EG model from the previous structure of V/A-ATPase (PDBID: 6QUM) were fitted  
3 into the density map as rigid bodies<sup>25</sup> with particular focus on the N terminal region of EG  
4 stalk (E; 1-77 aa., G; 2-33 aa.). The rough initial model was refined against the map with  
5 Phenix suite phenix.real\_space\_refine program<sup>41</sup>. The initial model was extensively  
6 manually corrected residue by residue in COOT<sup>41</sup> in terms of side-chain conformations.  
7 Peripheral stalks were removed due to low resolution in this region. The corrected model was  
8 again refined by the phenix.real\_space\_refine program with secondary structure and  
9 Ramachandran restraints, then the resulting model was manually checked by COOT. This  
10 iterative process was performed for several rounds to correct remaining errors until the model  
11 was in good agreement with geometry, as reflected by the MolProbity score of 1.08~1.74 and  
12 EMRinger score of 1.59 ~3.94<sup>42,43</sup>. For model validation against over-fitting, the built  
13 models were used for calculation of FSC curves against both half maps, and compared with  
14 the FSC of the final model against the final density map used for model building by  
15 phenix.refine program. The statistics of the obtained maps and the atomic model were  
16 summarized in Table S4. RMSD values between the atomic models were calculated using  
17 UCSF chimera<sup>44</sup>. All the figures were rendered using UCSF chimeraX<sup>45</sup>.

18

## 1   **References**

- 2    1.     Kuhlbrandt, W. Structure and Mechanisms of F-Type ATP Synthases. *Annu Rev*  
3         *Biochem* **88**, 515-549 (2019).
- 4    2.     Forgac, M. Vacuolar ATPases: rotary proton pumps in physiology and  
5         pathophysiology. *Nat Rev Mol Cell Biol* **8**, 917-29 (2007).
- 6    3.     Yokoyama, K. & Imamura, H. Rotation, structure, and classification of prokaryotic  
7         V-ATPase. *J Bioenerg Biomembr* **37**, 405-10 (2005).
- 8    4.     Guo, H. & Rubinstein, J.L. Cryo-EM of ATP synthases. *Curr Opin Struct Biol* **52**,  
9         71-79 (2018).
- 10   5.     Yoshida, M., Muneyuki, E. & Hisabori, T. ATP synthase - A marvellous rotary  
11         engine of the cell. *Nature Reviews Molecular Cell Biology* **2**, 669-677 (2001).
- 12   6.     Boyer, P.D. The ATP synthase--a splendid molecular machine. *Annu Rev Biochem*  
13         **66**, 717-49 (1997).
- 14   7.     Abrahams, J.P., Leslie, A.G., Lutter, R. & Walker, J.E. Structure at 2.8 Å resolution  
15         of F<sub>1</sub>-ATPase from bovine heart mitochondria. *Nature* **370**, 621-8 (1994).
- 16   8.     Allegretti, M. et al. Horizontal membrane-intrinsic  $\alpha$ -helices in the stator a-subunit  
17         of an F-type ATP synthase. *Nature* **521**, 237-40 (2015).

- 1 9. Mazhab-Jafari, M.T. et al. Atomic model for the membrane-embedded VO motor of  
2 a eukaryotic V-ATPase. *Nature* **539**, 118-122 (2016).
- 3 10. Imamura, H. et al. Evidence for rotation of V1-ATPase. *Proc Natl Acad Sci U S A*  
4 **100**, 2312-5 (2003).
- 5 11. Noji, H., Yasuda, R., Yoshida, M. & Kinosita, K., Jr. Direct observation of the  
6 rotation of F1-ATPase. *Nature* **386**, 299-302 (1997).
- 7 12. Yokoyama, K., Oshima, T. & Yoshida, M. Thermus thermophilus membrane-  
8 associated ATPase. Indication of a eubacterial V-type ATPase. *J Biol Chem* **265**,  
9 21946-50 (1990).
- 10 13. Yokoyama, K. et al. V-ATPase of Thermus thermophilus is inactivated during ATP  
11 hydrolysis but can synthesize ATP. *J Biol Chem* **273**, 20504-10 (1998).
- 12 14. Toei, M. et al. Dodecamer rotor ring defines H<sup>+</sup>/ATP ratio for ATP synthesis of  
13 prokaryotic V-ATPase from Thermus thermophilus. *Proc Natl Acad Sci U S A* **104**,  
14 20256-61 (2007).
- 15 15. Yokoyama, K., Nakano, M., Imamura, H., Yoshida, M. & Tamakoshi, M. Rotation  
16 of the proteolipid ring in the V-ATPase. *J Biol Chem* **278**, 24255-8 (2003).

- 1 16. Kishikawa, J.I. et al. Mechanical inhibition of isolated V(o) from V/A-ATPase for  
2 proton conductance. *Elife* **9**(2020).
- 3 17. Nakanishi, A., Kishikawa, J.I., Tamakoshi, M., Mitsuoka, K. & Yokoyama, K. Cryo  
4 EM structure of intact rotary H(+)-ATPase/synthase from *Thermus thermophilus*.  
5 *Nat Commun* **9**, 89 (2018).
- 6 18. Imamura, H. et al. Rotation scheme of V1-motor is different from that of F1-motor.  
7 *Proc Natl Acad Sci U S A* **102**, 17929-33 (2005).
- 8 19. Furuike, S. et al. Resolving stepping rotation in *Thermus thermophilus* H(+)-  
9 ATPase/synthase with an essentially drag-free probe. *Nat Commun* **2**, 233 (2011).
- 10 20. Bai, X.C., McMullan, G. & Scheres, S.H. How cryo-EM is revolutionizing  
11 structural biology. *Trends Biochem Sci* **40**, 49-57 (2015).
- 12 21. Cheng, Y. Single-particle cryo-EM-How did it get here and where will it go.  
13 *Science* **361**, 876-880 (2018).
- 14 22. Sobti, M. et al. Cryo-EM reveals distinct conformations of *E. coli* ATP synthase on  
15 exposure to ATP. *Elife* **8**(2019).



- 1 23. Hiraizumi, M., Yamashita, K., Nishizawa, T. & Nureki, O. Cryo-EM structures  
2 capture the transport cycle of the P4-ATPase flippase. *Science* **365**, 1149-1155  
3 (2019).
- 4 24. Nakano, M. et al. ATP hydrolysis and synthesis of a rotary motor V-ATPase from  
5 *Thermus thermophilus*. *J Biol Chem* **283**, 20789-96 (2008).
- 6 25. Zhou, L. & Sazanov, L.A. Structure and conformational plasticity of the intact  
7 *Thermus thermophilus* V/A-type ATPase. *Science* **365**(2019).
- 8 26. Menz, R.I., Walker, J.E. & Leslie, A.G. Structure of bovine mitochondrial F(1)-  
9 ATPase with nucleotide bound to all three catalytic sites: implications for the  
10 mechanism of rotary catalysis. *Cell* **106**, 331-41 (2001).
- 11 27. Adachi, K. et al. Coupling of rotation and catalysis in F(1)-ATPase revealed by  
12 single-molecule imaging and manipulation. *Cell* **130**, 309-21 (2007).
- 13 28. Löbau, S., Weber, J. & Senior, A.E. Nucleotide occupancy of F1-ATPase catalytic  
14 sites under crystallization conditions. *FEBS Lett* **404**, 15-8 (1997).
- 15 29. Boyer, P.D. Catalytic site forms and controls in ATP synthase catalysis. *Biochim*  
16 *Biophys Acta* **1458**, 252-62 (2000).

- 1 30. Watanabe, R. & Noji, H. Timing of inorganic phosphate release modulates the  
2 catalytic activity of ATP-driven rotary motor protein. *Nat Commun* **5**, 3486 (2014).
- 3 31. Watanabe, R., Iino, R. & Noji, H. Phosphate release in F1-ATPase catalytic cycle  
4 follows ADP release. *Nat Chem Biol* **6**, 814-20 (2010).
- 5 32. Sobti, M., Ueno, H., Noji, H. & Stewart, A.G. The six steps of the complete F(1)-  
6 ATPase rotary catalytic cycle. *Nat Commun* **12**, 4690 (2021).
- 7 33. Wang, H. & Oster, G. Energy transduction in the F1 motor of ATP synthase. *Nature*  
8 **396**, 279-82 (1998).
- 9 34. Yasuda, R., Noji, H., Yoshida, M., Kinosita, K., Jr. & Itoh, H. Resolution of distinct  
10 rotational substeps by submillisecond kinetic analysis of F1-ATPase. *Nature* **410**,  
11 898-904 (2001).
- 12 35. Mastronarde, D.N. Automated electron microscope tomography using robust  
13 prediction of specimen movements. *J Struct Biol* **152**, 36-51 (2005).
- 14 36. Punjani, A., Rubinstein, J.L., Fleet, D.J. & Brubaker, M.A. cryoSPARC: algorithms  
15 for rapid unsupervised cryo-EM structure determination. *Nat Methods* **14**, 290-296  
16 (2017).

- 1 37. Scheres, S.H. RELION: implementation of a Bayesian approach to cryo-EM  
2 structure determination. *J Struct Biol* **180**, 519-30 (2012).
- 3 38. Rohou, A. & Grigorieff, N. CTFFIND4: Fast and accurate defocus estimation from  
4 electron micrographs. *J Struct Biol* **192**, 216-21 (2015).
- 5 39. Zheng, S.Q. et al. MotionCor2: anisotropic correction of beam-induced motion for  
6 improved cryo-electron microscopy. *Nat Methods* **14**, 331-332 (2017).
- 7 40. Bepler, T. et al. Positive-unlabeled convolutional neural networks for particle  
8 picking in cryo-electron micrographs. *Nat Methods* **16**, 1153-1160 (2019).
- 9 41. Liebschner, D. et al. Macromolecular structure determination using X-rays,  
10 neutrons and electrons: recent developments in Phenix. *Acta Crystallogr D Struct*  
11 *Biol* **75**, 861-877 (2019).
- 12 42. Barad, B.A. et al. EMRinger: side chain-directed model and map validation for 3D  
13 cryo-electron microscopy. *Nat Methods* **12**, 943-6 (2015).
- 14 43. Chen, V.B. et al. MolProbity: all-atom structure validation for macromolecular  
15 crystallography. *Acta Crystallogr D Biol Crystallogr* **66**, 12-21 (2010).
- 16 44. Pettersen, E.F. et al. UCSF Chimera--a visualization system for exploratory research  
17 and analysis. *J Comput Chem* **25**, 1605-12 (2004).

- 1 45. Pettersen, E.F. et al. UCSF ChimeraX: Structure visualization for researchers,  
2 educators, and developers. *Protein Sci* **30**, 70-82 (2021).

3

4

## 1 **Acknowledgements**

2 We are grateful to all the members of the Yokoyama Lab for their continuous support and  
3 technical assistance. Our research was supported by Grant-in-Aid for Scientific Research  
4 (JSPS KAKENHI) Grant Number 20H03231 to K.Y., 20K06514 to J.K., and Grant-in-Aid  
5 for JSPS Fellows Grant Number 20J00162 to A.Nakanishi, and Takeda Science foundation  
6 to K.Y. Our research was also supported by Platform Project for Supporting Drug  
7 Discovery and Life Science Research (Basis for Supporting Innovative Drug Discovery and  
8 Life Science Research (BINDS)) from AMED under Grant Number JP17am0101001  
9 (support number 1312), Grants-in-Aid from “Nanotechnology Platform” of the Ministry of  
10 Education, Culture, Sports, Science and Technology (MEXT) to K.M. (Project Number.  
11 12024046), and the Research Program for Next Generation Young Scientists of "Five-star  
12 Alliance" in "NJRC Mater. & Dev." under Grant Number 20215008 to A. Nakano.

13

## 14 **Author contributions**

15 KY, JK, A.Nakanishi and A.Nakano designed, performed and analyzed the experiments.  
16 JK, A.Nakanishi, KY, A.Nakano, AF, and SS analyzed the data and contributed to the  
17 preparation of the samples. TK and KM provided technical support and conceptual advice.

1 KY designed and supervised the experiments and wrote the manuscript. All authors  
2 discussed the results and commented on the manuscript.

3

#### 4 **Declaration of interests**

5 The authors declare no conflicts of interest associated with this manuscript.

6

7

## 1 **Figure legends**

### 2 **Fig. 1: Schematic representation of rotary ATPases and the conventional rotary**

3 **mechanism. a**, Illustration of subunit composition of different types of rotary ATPases;

4 prokaryotic V/A-ATPase (*left*), eukaryotic V-ATPase (*middle*), prokaryotic F-ATPase

5 (*right*). The stators are represented in various colors and the rotors are represented in grey.

6 **b**, A schematic model of the rotary catalytic mechanism of the V/A-ATPase. When

7 powered by ATP, the central rotor composed of  $D_1F_1d_1c_{10}$  (grey) rotates against a

8 surrounding stator composed of  $A_3B_3E_2G_2a_1$  (white), coupled with proton translocation

9 across the membrane. **c**, The conventional catalytic cycle of V/A-ATPase. At low ATP

10 concentration, the ATP binding dwell time is increased. ATP $\gamma$ S also prolongs the ATP

11 hydrolysis dwell.

12

### 13 **Fig. 2: Cryo-EM density map and the atomic model for nucleotide free V/A-ATPase.**

14 **a**, Cryo-EM density map of whole V/A-ATPase of state1 in the absence of nucleotide

15 ( $V_{\text{nucfree}}$  structure). **b**, Cryo-EM density map of  $V_1EG$  of state1 without nucleotide (*left*).

16 Cross sections of the nucleotide binding sites (*right upper*) and  $A_3B_3$  C-terminal region

17 (*right lower*) viewed from top. **c**, Comparison of the AB dimer structures in  $V_{\text{nucfree}}$ . AB

1 dimers are shown as space filling models and superimposed on the  $\beta$  barrel domain (A  
2 subunit 1-70 a.a.). *Left*; AB<sub>open</sub> (solid) vs AB<sub>semi</sub> (semi-transparent), *middle*; AB<sub>open</sub> (solid)  
3 vs AB<sub>closed</sub> (semi-transparent), and AB<sub>semi</sub> (solid) vs AB<sub>closed</sub> (semi-transparent). **d**,  
4 Comparison between each AB subunit in V<sub>nucfree</sub>. The subunits are shown as wire  
5 representation. A and B subunits are superimposed on the  $\beta$  barrel domain.

6

7 **Fig. 3: Structures of nucleotide binding sites obtained in each condition. upper panels:**

8 V<sub>nucfree</sub> (**a**), V<sub>prehyd</sub> (**b**), V<sub>3nuc</sub> (**c**), and V<sub>2nuc</sub> (**d**) viewed from the cytosolic side. Scale bar is

9 20 Å. Magnified views of the three nucleotide binding sites (AB<sub>open</sub>, AB<sub>semi</sub>, and AB<sub>closed</sub>)

10 in each structure are shown in the rows below. Cryo-EMmaps are represented as semi-

11 translucent. Bound nucleotides and Mg ions are shown in ball-and-stick and sphere

12 representation, respectively. Scale bar is 4 Å

13

14 **Fig. 4: Comparison between state1-1 and 1-2 in each subunit of V<sub>3nuc</sub>.** The subunits of

15 state1-1 and 1-2 were superimposed on the  $\beta$  barrel domain (A: 1-70 a.a., B: 1-70 a.a.).

16 Ribbon models are colored by the *rmsd* values calculated for the atoms of the main chain;

17 gray (small changes) to red (large changes). Magnified views of the CHBs are represented



1 in the lower panels as wire models. The models of state1-1 are represented in gray, and  
2 state1-2 are represented in the different colors. **a**, subunits in  $AB_{\text{closed}}$ , **b**, subunits in  $AB_{\text{semi}}$ ,  
3 **c**, subunits in  $AB_{\text{open}}$ .

4

5 **Fig. 5: Coordination of nucleotides in the binding sites of  $V_{3\text{nuc}}$  and  $V_{\text{prehyd}}$ .** *Left*

6 *panels*; Comparison of the three nucleotide binding sites ( $AB_{\text{open}}$  (**a**),  $AB_{\text{semi}}$  (**b**), and

7  $AB_{\text{closed}}$  (**c**) of state1-1 of  $V_{3\text{nuc}}$  shown with colored (green, blue and pink) atoms and

8 bonds, and main chain, and state1-1 of  $V_{\text{prehyd}}$  shown with grey atoms, bonds and main

9 chain. *Right panels*; Schematic representations of the coordination of the ATP group in

10 the three binding sites of  $V_{3\text{nuc}}$  and  $V_{\text{prehyd}}$  in parentheses. The distances between the atoms

11 are shown in dotted lines. All distances are in Å.

12

13 **Fig. 6: Chemo-Mechanical cycle of V/A-ATPase driven by ATP hydrolysis.** The

14 structures of V/A-ATPase viewed from the cytosolic side are shown as ribbon models. The

15 coiled coil of the DF subunits is shown in grey. The bound ATP molecules are

16 highlighted in sphere representations. State1-1 and 1-2 of  $V_{2\text{nuc}}$  are in equilibrium and are

17 fluctuating. These structures transit to state 1-1 and 1-2 of  $V_{3\text{nuc}}$  by ATP binding to  $AB_{\text{open}}$ ,

1 without a  $120^\circ$  rotation step of the DF rotor.  $V_{3nuc}$  in state1-1 and state1-2 are also in  
2 equilibrium. ATP hydrolysis at  $AB_{semi}$  and zipper motion at  $AB_{open}$  occur simultaneously.  
3 This triggers the transition of  $V_{3nuc}$  in state1-2 to  $V_{2nuc}$  state2-2 together with the  
4  $120^\circ$  rotation step and simultaneous release of ADP and  $P_i$ . State2 of  $V_{2nuc}$  returns to  
5 state1 via state3 of  $V_{2nuc}$  by the same process. Asterisks indicate the structures which were  
6 not identified in this study.

7

8 **Fig. 7: The rotary mechanism of V/A-ATPase powered by ATP hydrolysis.** The  
9 schematic models of  $AB_{open}$ ,  $AB_{semi}$ , and  $AB_{closed}$  are shown in green, pink, and blue,  
10 respectively. The coiled coil region of the D subunit in contact with  $A_3B_3$  is shown in  
11 grey. In the ADP inhibited state, the entrapped ADP in  $AB_{closed}$  hampers structural  
12 transition of  $AB_{open}$  to  $AB_{semi}$  by binding of ATP to  $AB_{open}$ . The  $V_{nucfree}$  in ground state is  
13 activated by the binding of ATP to the catalytic sites. In  $V_{2nuc}$  awaiting ATP binding,  
14 binding of ATP to  $AB_{open}$  does not induce the  $120^\circ$  rotation step. In  $V_{3nuc}$ , both zipper  
15 motion of  $AB_{open}$  and ATP hydrolysis in  $AB_{semi}$  induce unzipper motion of  $AB_{closed}$   
16 accompanying with the release of ADP and  $P_i$ . The catalytic events in the three AB

- 1 dimers occurs simultaneously with the 120° step of the DF shaft, resulting in structural
- 2 transition of state1 of  $V_{3nuc}$  to state2 of  $V_{2nuc}$ .
- 3

1 **Figures**

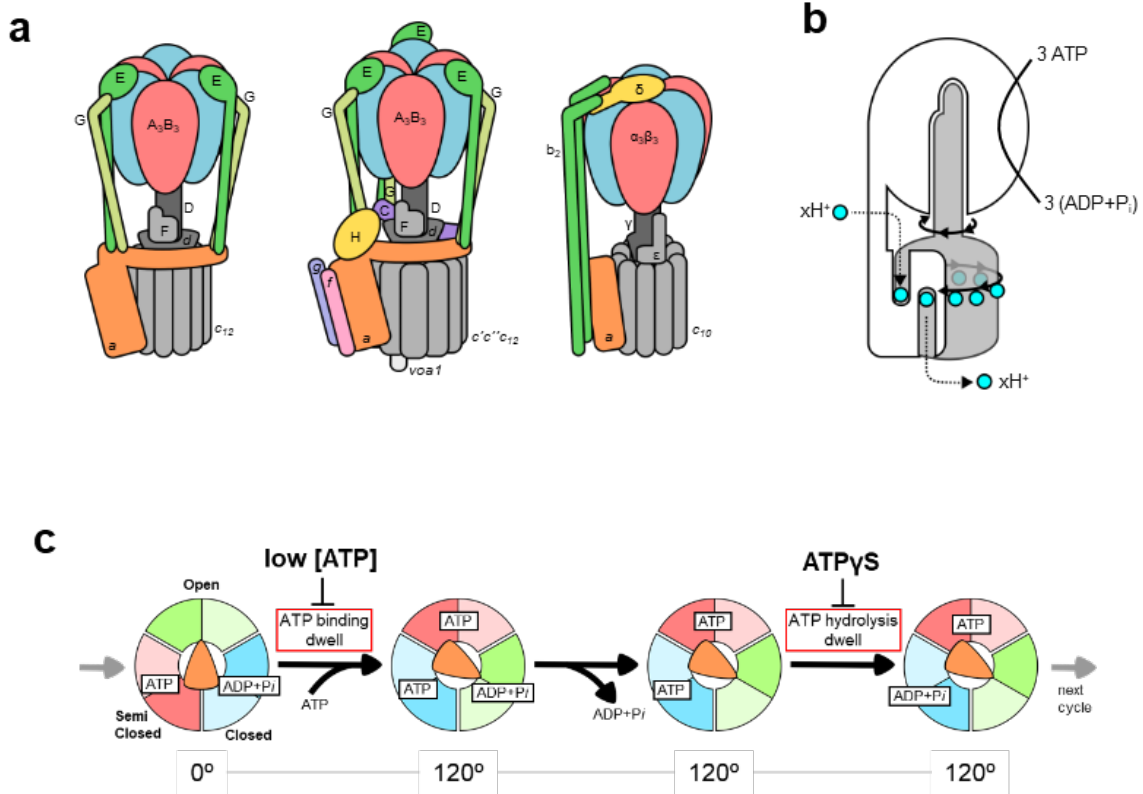

3 **Fig. 1: Schematic representation of rotary ATPases and the conventional rotary**  
 4 **mechanism.**

5

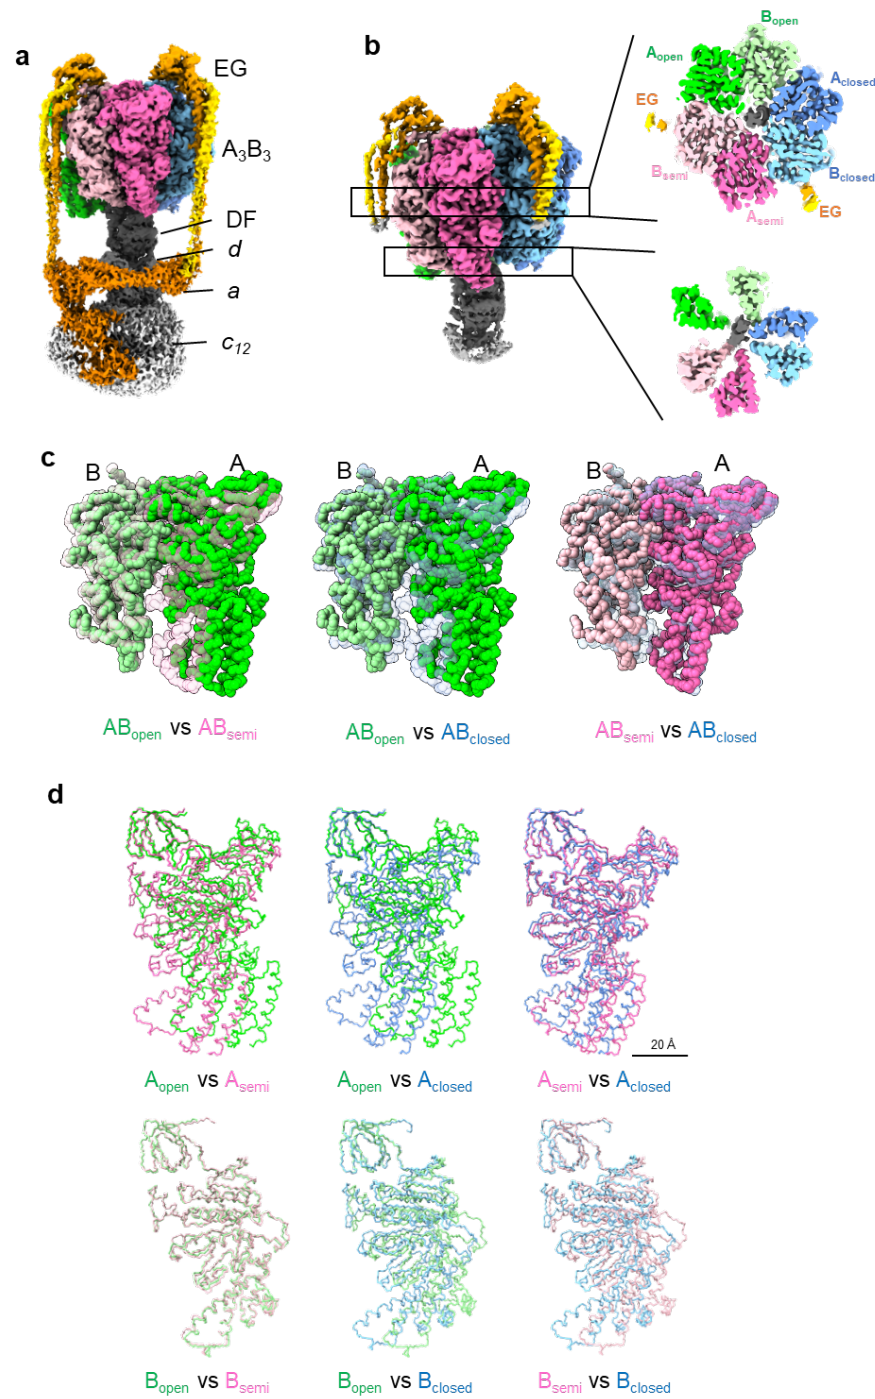

2 **Fig. 2: Cryo-EM density map and the atomic model for nucleotide free V/A-ATPase.**

3

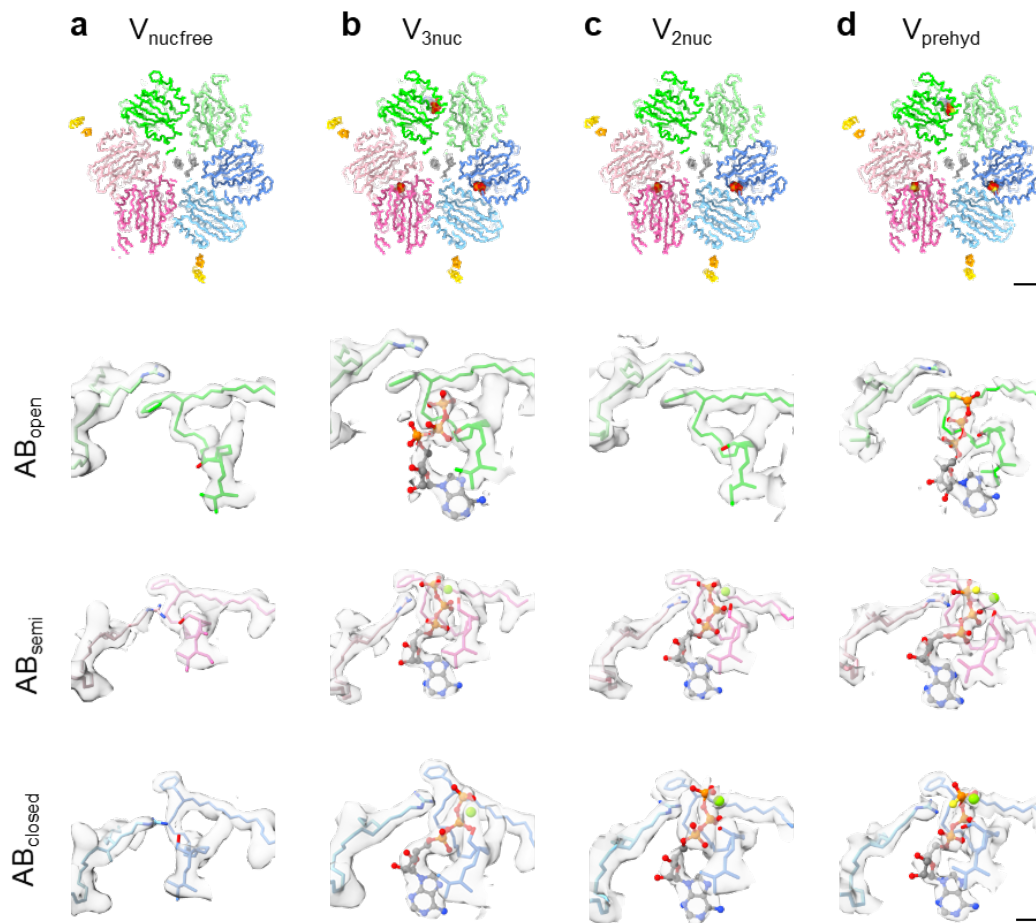

2 **Fig. 3: Structures of nucleotide binding sites obtained in each condition.**

3

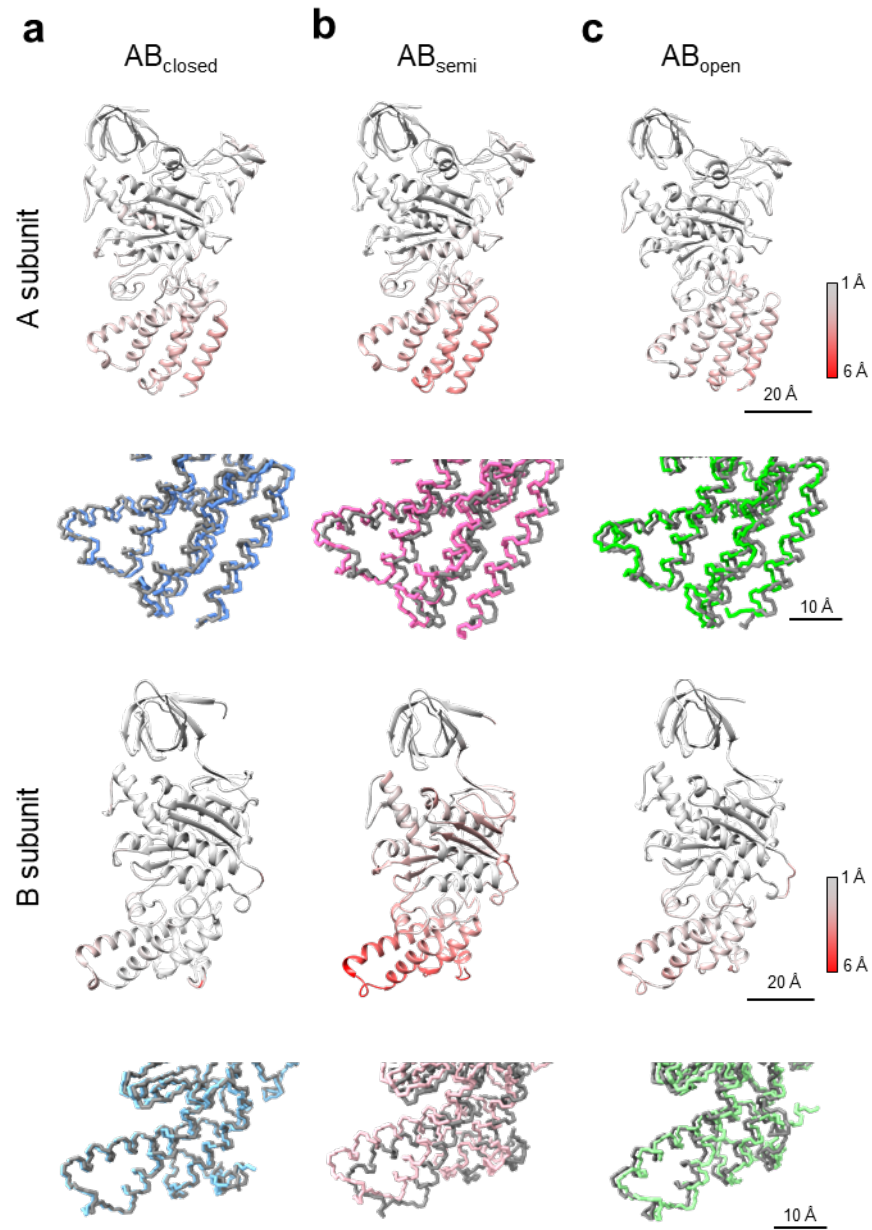

2 **Fig. 4: Comparison between state1-1 and 1-2 in each subunit of  $V_{3\text{nuc}}$ .**

3

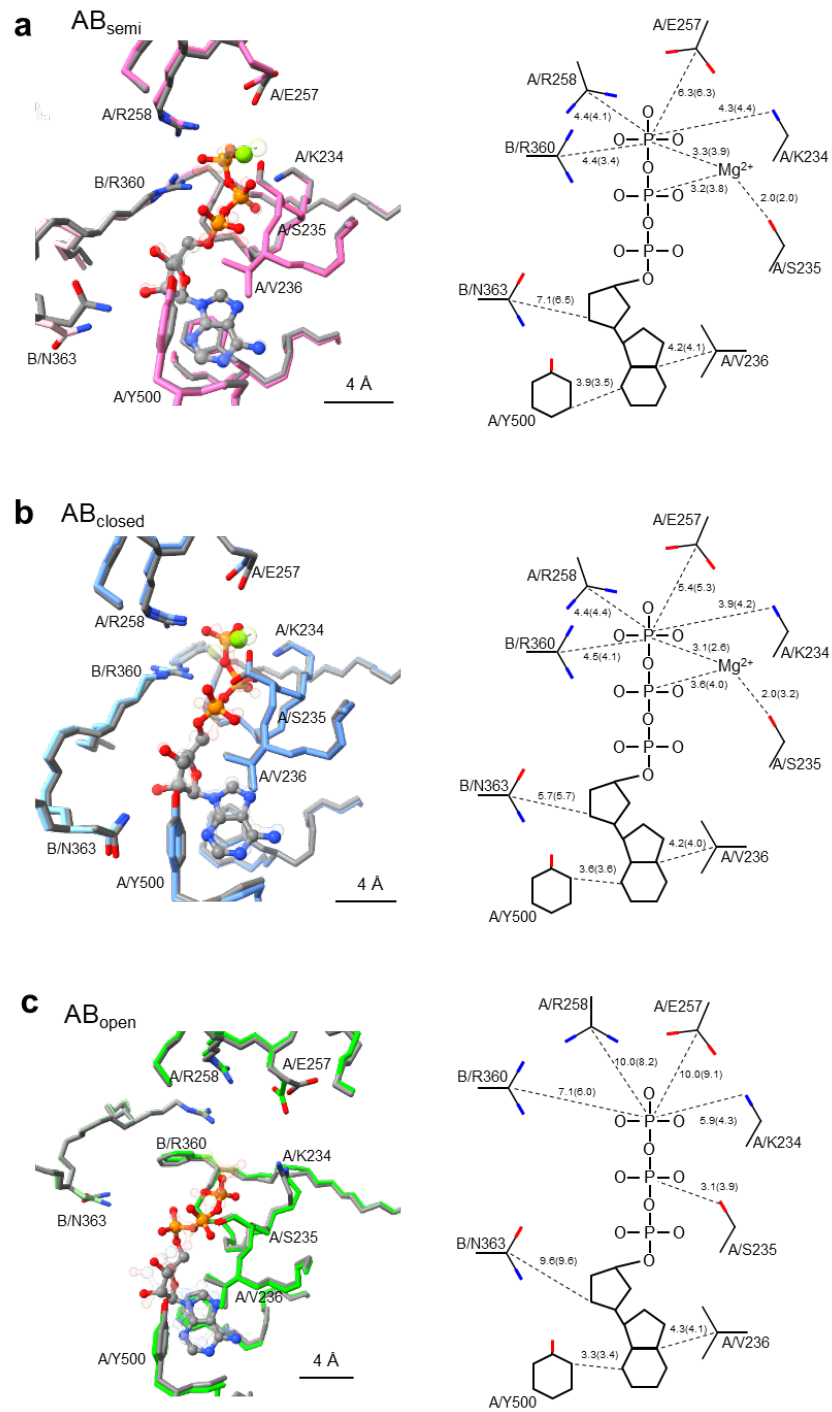

2 **Fig. 5: Coordination of nucleotides in the binding sites of  $V_{3\text{nuc}}$  and  $V_{\text{prehyd}}$ .**

3



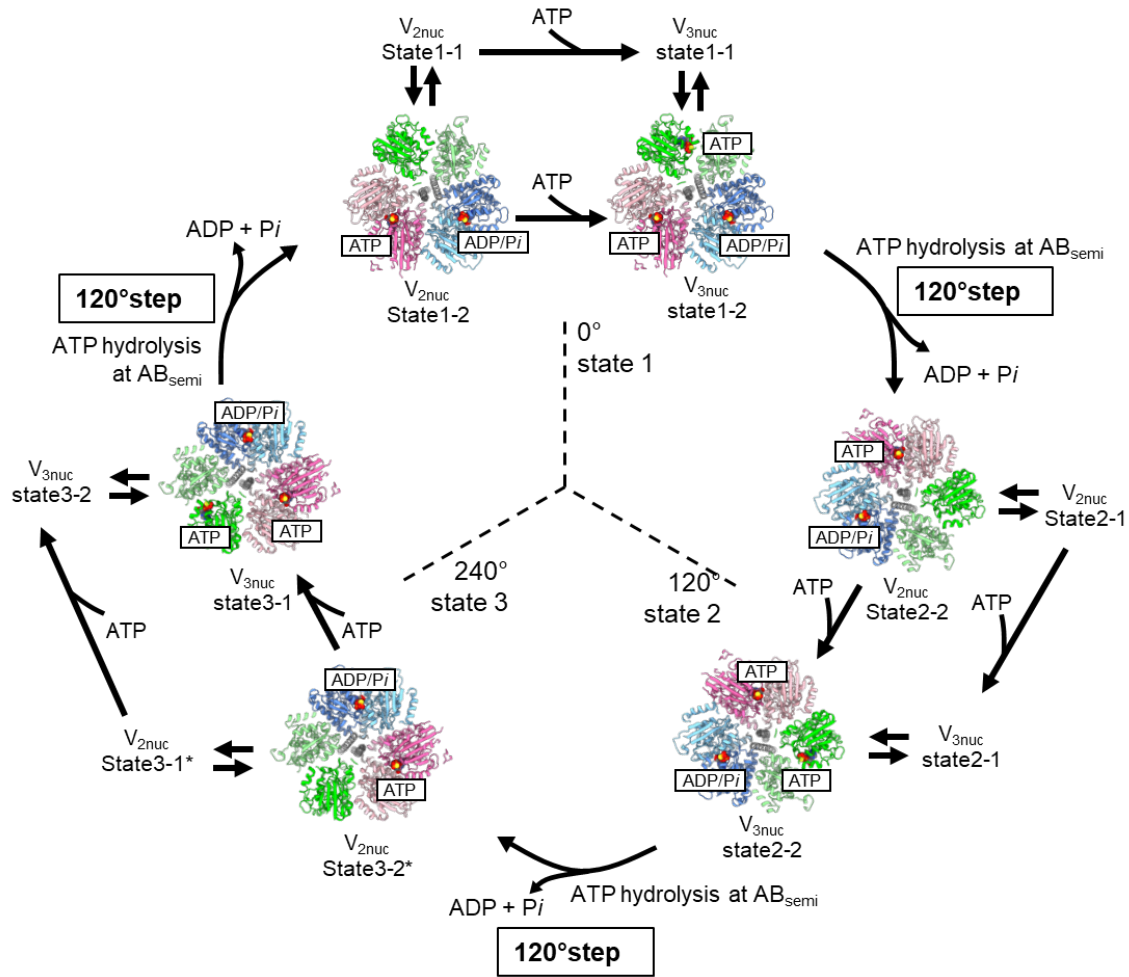

2 **Fig. 6: Chemo-Mechanical cycle of V/A-ATPase driven by ATP hydrolysis.**

3

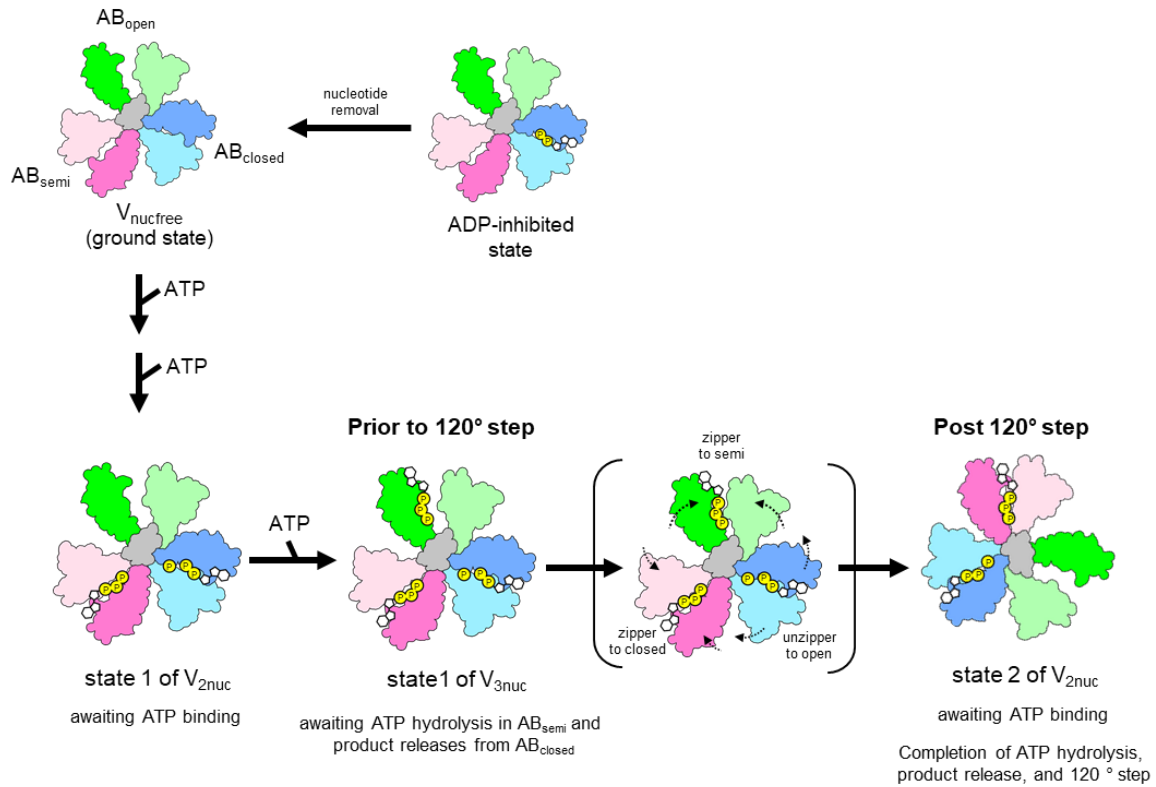

2 **Fig. 7: The rotary mechanism of V/A-ATPase powered by ATP hydrolysis.**

3
